# Supplementary material for: Remodeling the fibrotic tumor microenvironment of desmoplastic melanoma to facilitate vaccine immunotherapy
Source: Royal Society of Chemistry journal article supplement (doi:10.1039/c9nr09610h), 2020-01-01
Supplement: c9nr09610h1.pdf [file c9nr09610h1.pdf]

*Supplementary Information*

## **Remodeling Fibrotic Tumor Microenvironment of Desmoplastic Melanoma to Facilitate Vaccine Immunotherapy**

Hongda Zhu<sup>a, b, #</sup>, Qi Liu<sup>a, #</sup>, Lei Miao<sup>a</sup>, Sara Musetti<sup>a</sup>, Meirong Huo<sup>c</sup>, and Leaf Huang<sup>a, \*</sup>

a, Division of Pharmacoengineering and Molecular Pharmaceutics and Center for Nanotechnology in Drug Delivery, University of North Carolina at Chapel Hill, Chapel Hill, North Carolina, USA

b, School of Food and Biological Engineering, National “111” Center for Cellular Regulation and Molecular Pharmaceutics, Key Laboratory of Fermentation Engineering (Ministry of Education), Hubei University of Technology, Wuhan, China

c, State Key Laboratory of Natural Medicines, Department of Pharmaceutics, China Pharmaceutical University, Nanjing 210009, China

# Hongda Zhu and Qi Liu Contributed equally

\*Address for correspondence: Leaf Huang, E-mail: [leafh@email.unc.edu](mailto:leafh@email.unc.edu)

### **Preparation Lipid calcium-phosphate nanoparticle (LCP NP)**

A well-dispersed oil phase was formed with 20 mL mixture solution containing cyclohexane/Igepal CO-520 (71:29, v/v) and 600  $\mu\text{L}$  of 2.5 M  $\text{CaCl}_2$  containing modified  $\text{BRAF}^{\text{V600E}}$  peptide, immune-stimulator adjuvant CpG ODN. Meanwhile, 600  $\mu\text{L}$   $\text{Na}_2\text{HPO}_4$  (12.5 mM, pH = 9.0) and 400  $\mu\text{L}$  DOPA (20 mM) was added in oil phase, stirring two phases for 30 min. Then cores deposited when 40 mL ethanol was added and collected using centrifugation (10,000 g  $\times$  15 min). One hundred  $\mu\text{L}$  of 20 mM DOTAP, 20  $\mu\text{L}$  of 20 mM DSPE-PEG-2000, 20  $\mu\text{L}$  DSPE-PEG-mannose (20 mM) and 100  $\mu\text{L}$  Cholesterol in chloroform were mixed with 1 mL CaP cores. After removing of chloroform using reduced pressure, the final LCP NP was dispersed in 100  $\mu\text{L}$  glucose (5 %).

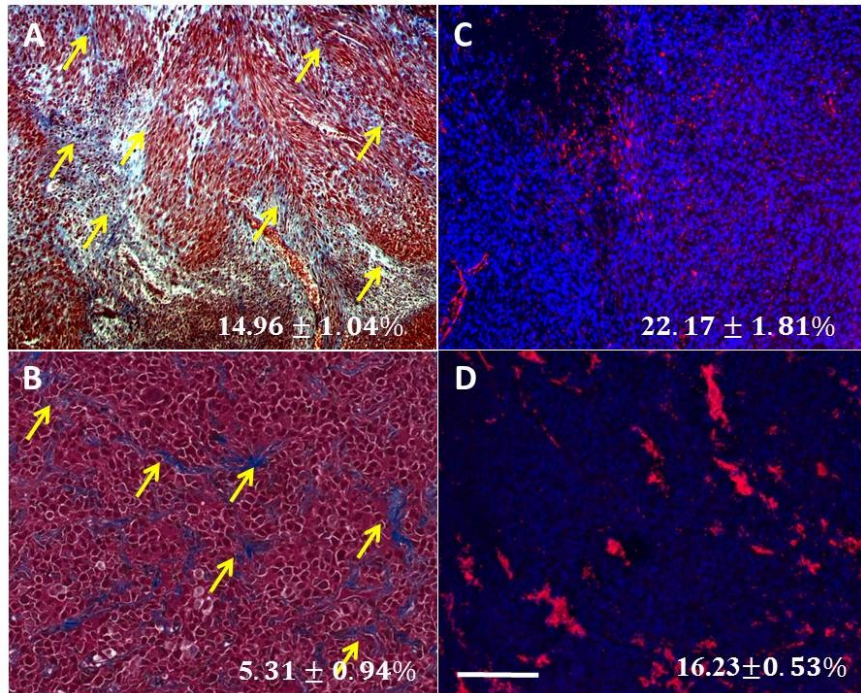

Fig. S1 The difference of collagen fiber and TAFs between murine DM model (BPD6 tumor model) and murine non-DM model (B16F10 tumor model). Masson's trichrome staining illustrating collagen morphology within BPD6 tumor model (A) and B16F10 tumor model (B), and also  $\alpha$ -SMA staining illustrating TAFs within BPD6 tumor model (C) and B16F10 tumor model (D). For (A) and (B), the blue color represents collagen fibers (pointed out by yellow arrows). For (C) and (D), the red color represents  $\alpha$ -SMA (as TAF marker). The scale bar represents 200  $\mu$ m.

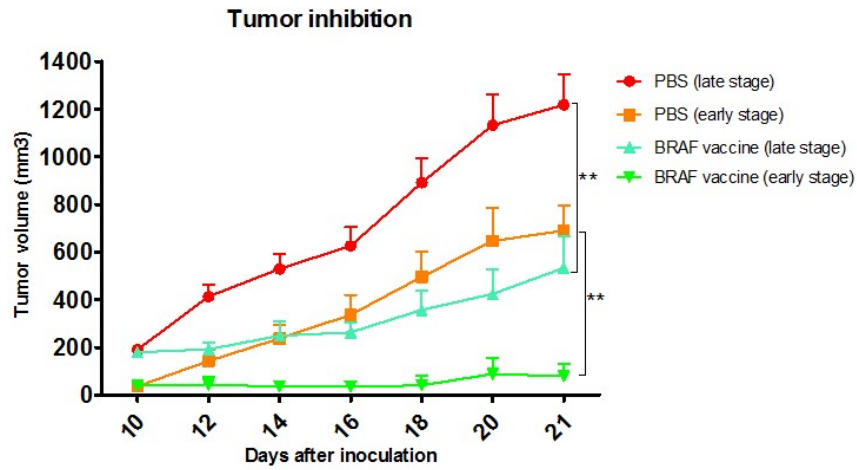

Inoculation:

- Early stage: inoculate  $2 \times 10^5$  cells per mouse @ Day 0
- Late stage: inoculate  $1 \times 10^6$  cells per mouse @ Day 0

Fig. S2 The BRAF peptide vaccine showed inhibition of tumor growth at different stages of the murine DM model. C57BL/6 mice were inoculated with  $2 \times 10^5$  BPD6 cells per mouse for “early stage” tumor growth inhibition study, or  $1 \times 10^6$  BPD6 cells per mouse for “late stage” tumor growth inhibition study. Tumor cells were inoculated on mice subcutaneously on day 0, and vaccination was given on day 10 (n=5). \*\*p < 0.01. At early stage, vaccine alone showed long-lasting tumor inhibition, while at advanced late stage tumor, vaccination could only achieve partial efficacy.

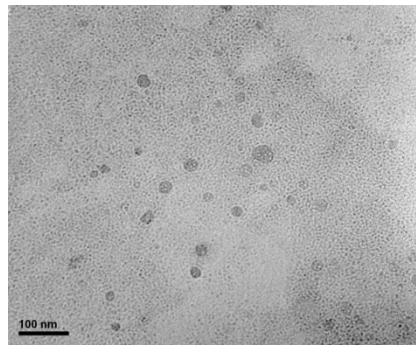

Fig. S3 Characterization of LCP-BRAF peptide vaccine.

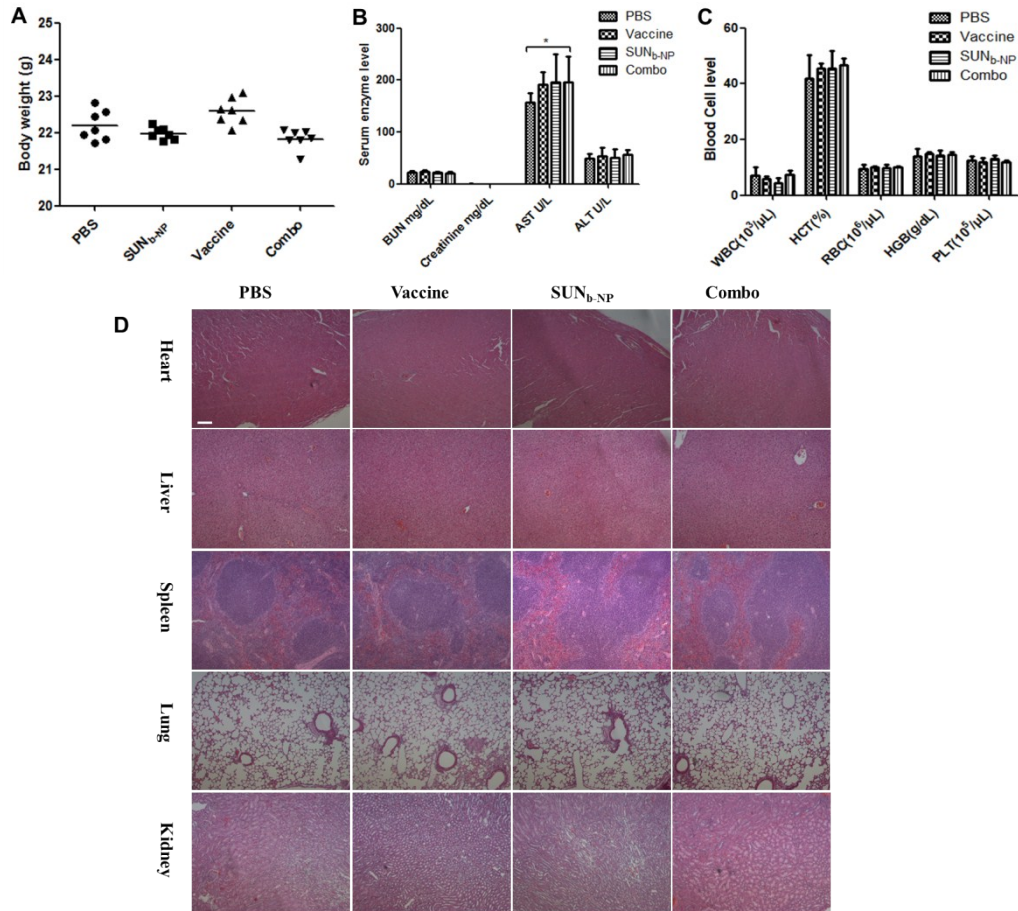

Fig. S4 Safety evaluations. Throughout the tumor inhibition study, mice body weights were monitored every two days. Blood samples, major organs and tumor tissue were harvested at the endpoint of study, when mice were humanely sacrificed (on day 24 after tumor cell inoculation). **(A)** Body weight change at endpoint day of study. **(B)** Liver, kidney function assays and **(C)** whole blood cell analysis after treatment. **(D)** H&E stained heart, liver, spleen, lung, and kidney sections from tumor-bearing mice after treatment. The white scale bar represents 100  $\mu$ m. Results were expressed as the mean  $\pm$  S.D. (n = 4-5). \*p < 0.05,

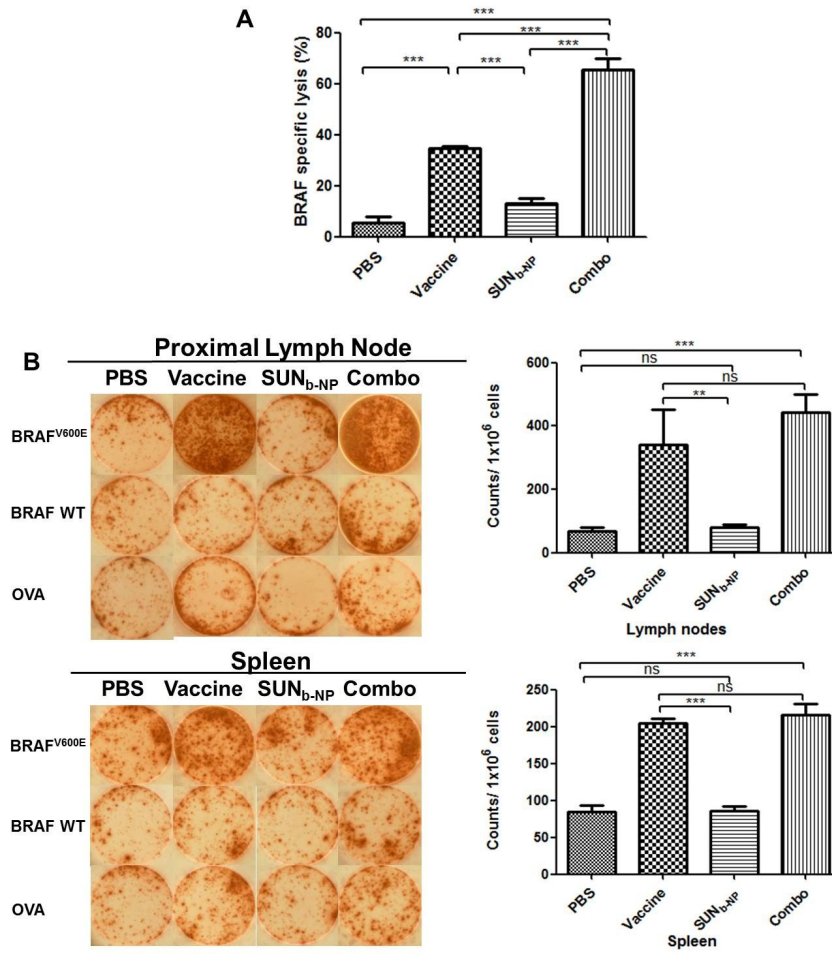

Fig. S5 Antigen-specific immune response. (A) CTL response after vaccination *in vivo*, n=5. (B) IFN- $\gamma$  production after vaccination was detected using ELISPOT assay. \*\*p < 0.01, \*\*\*p < 0.001 and ns, not significant. n = 3.

**Tab. S1** Antibodies used in the study

| Antibodies                                                       | Company                           | Catalog        | Application              |
|------------------------------------------------------------------|-----------------------------------|----------------|--------------------------|
| Anti- $\alpha$ SMA                                               | Abcam                             | Ab5694         | IF                       |
| Anti-CD31                                                        | Abcam                             | Ab28364        | IF                       |
| Anti-CD8<br>(PE-conjugated)                                      | BD                                | 553032         | flow cyt                 |
| Anti-CD8<br>(FITC-conjugated)                                    | BD                                | 553031         | IF                       |
| Anti-CD4<br>(FITC-conjugated)                                    | BD                                | 561828         | IF, flow cyt             |
| Anti-FOXP3<br>(PE-conjugated)                                    | BD                                | 560408         | IF, flow cyt             |
| Anti-CD11b<br>(FITC-conjugated)                                  | BD                                | 553310         | IF, flow cyt             |
| Anti-Gr1 (Ly-6G and Ly-6C)<br>(PE-conjugated)                    | BD PharmingenTM                   | 553128         | IF, flow cyt             |
| APC Rat IgG2b,<br>Anti-Rabbit IgG<br>(Alex Fluor® 647 Conjugate) | BD PharmingenTM<br>Cell Signaling | 553991<br>4414 | flow cyt<br>IF, flow cyt |
| Goat Anti-Rabbit IgG-HRP                                         | Santa Cruz                        | Sc-2030        | WB                       |
| Phospho-Stat3 (Ser727)                                           | Cell Signaling                    | 9134           | WB                       |
| Stat3 (79D7)                                                     | Cell Signaling                    | 4904           | WB                       |
| Phospho-Akt (Ser473)                                             | Cell Signaling                    | 4060           | WB                       |
| Akt (C67E7)                                                      | Cell Signaling                    | 4691           | WB                       |
| PD-L1                                                            | Invitrogen                        | PA5-20343      | WB                       |
| GAPDH                                                            | Santa Cruz                        | I3015          | WB                       |

**Tab. S2** Characterization of SUN<sub>b-NP</sub> (n=3)

|           | Blank NP  | SUN <sub>b-NP</sub> |
|-----------|-----------|---------------------|
| Size (nm) | 116.4±3.3 | 85.7±2.3            |
| Zeta (mV) | -17.0±0.3 | 7.0±0.2             |

**Tab. S3** *In vivo* pharmacokinetic parameters of <sup>3</sup>H-labeled SUN<sub>b-NP</sub> and SUN solution in DM tumor-bearing C57BL/6 mice hosts (n = 5)

|                               | <sup>3</sup> H SUN solution | <sup>3</sup> H SUN <sub>b-NP</sub> |
|-------------------------------|-----------------------------|------------------------------------|
| K (h <sup>-1</sup> )          | 0.10±0.03                   | 0.01±0.01                          |
| AUC <sub>0-t</sub> (mg.h/mL)  | 632.2±326.5                 | 1381.9±442.6                       |
| AUC <sub>0-∞</sub> ((mg.h/mL) | 688.1±367.3                 | 1698.3±406.2                       |
| T <sub>1/2</sub> (h)          | 7.5±0.8                     | 5.3±0.6                            |
